# Supplementary material for: Pan-Cancer Methylated Dysregulation of Long Non-coding RNAs Reveals Epigenetic Biomarkers
Source: Front Cell Dev Biol. 2022 May 27;10:882698. doi: 10.3389/fcell.2022.882698 (PMC9200062; doi:10.3389/fcell.2022.882698)
Supplement: Supplementary file 1 [file Table2.XLSX]

## Sheet: Sheet1
Supplementary Table S2. The number of samples and mRNAs for each cancer in expression data.
Cancers	Samples	mRNAs
BLCA	251	17507
BRCA	529	17681
CESC	304	26304
HNSC	422	17656
KIRC	246	17598
KIRP	181	17358
LIHC	196	16995
LUAD	425	17709
LUSC	92	18039
PRAD	371	17668
STAD	375	17426
THCA	492	17417
UCEC	551	24779
